# Supplementary material
Source: PubMed Central journal article supplement (PMC7645172)
Supplement: EMBR-21-e50202-s004.pdf [file EMBR-21-e50202-s004.pdf]

**Figure 3 source data**

**Figure 3A**

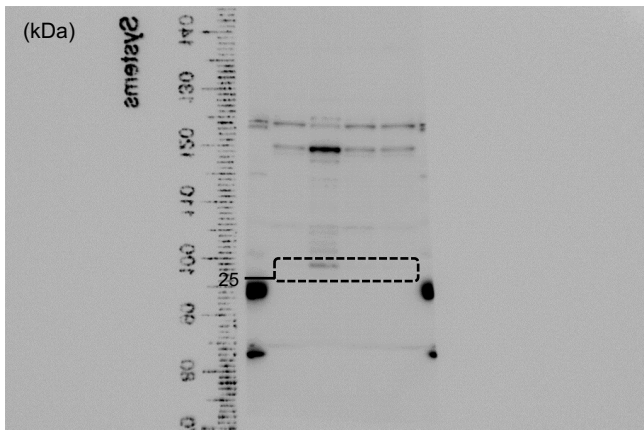

Blot: anti-FTMT

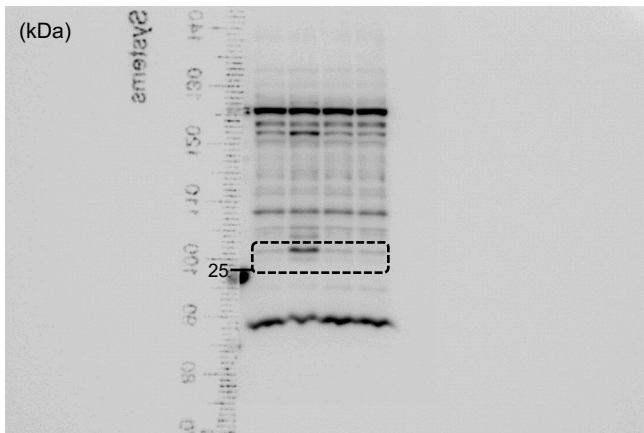

Blot: anti-FTMT

**Figure 3C**

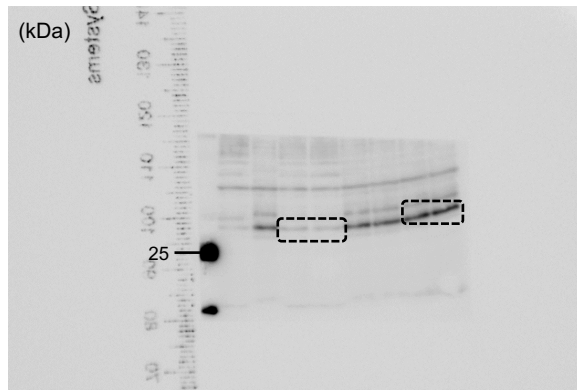

Blot: anti-FTMT

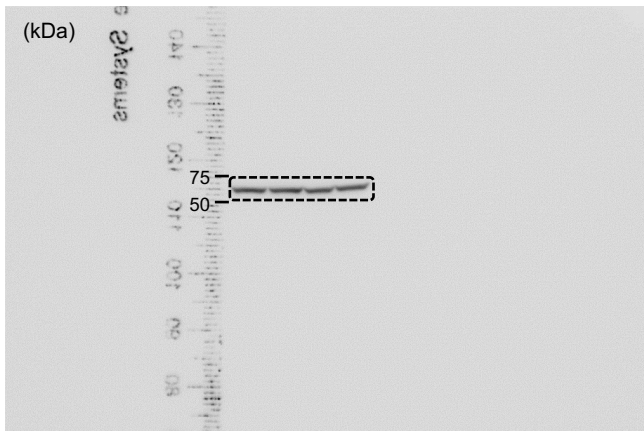

Blot: anti-HSP60

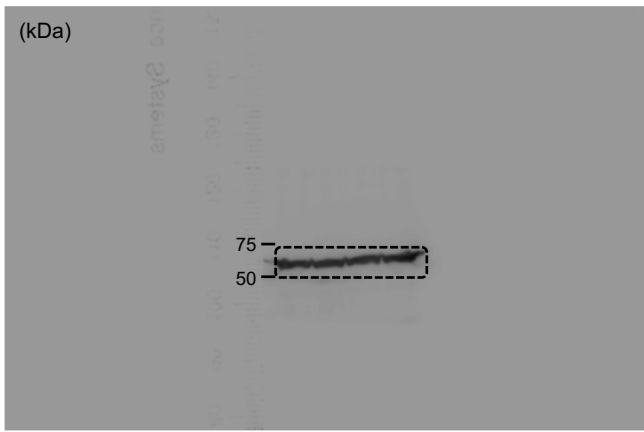

Blot: anti-HSP60

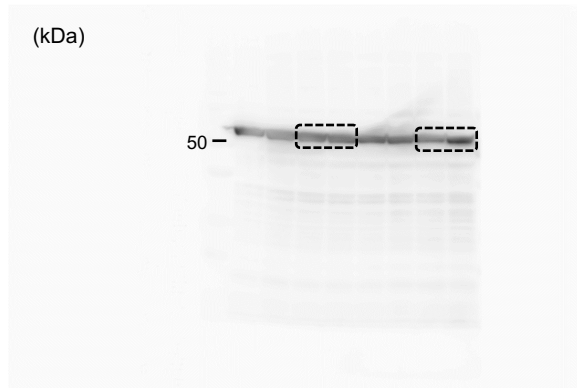

Blot: anti-HSP60
