# Supplementary material
Source: PubMed Central journal article supplement (PMC7645172)
Supplement: EMBR-21-e50202-s006.pdf [file EMBR-21-e50202-s006.pdf]

**Figure 5 source data**

**Figure 5E**

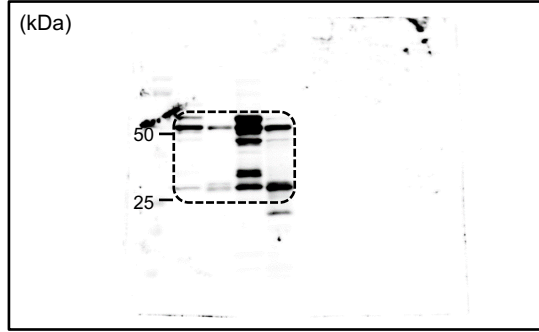

Blot: anti-FTMT

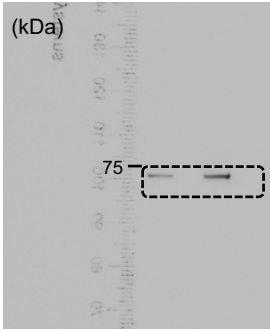

Blot: anti-NCOA4

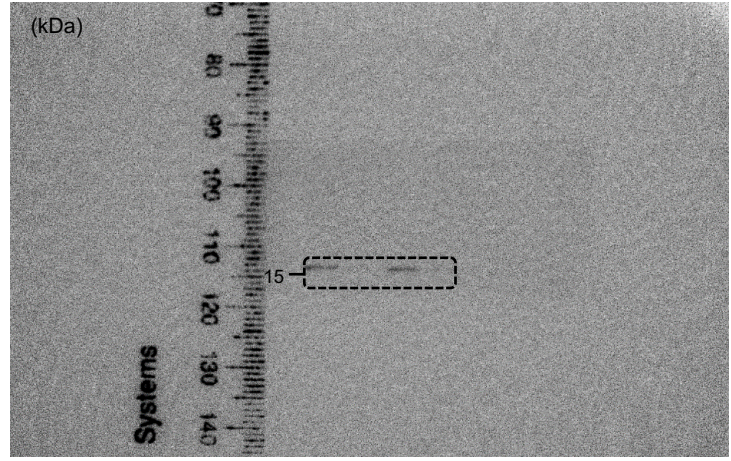

Blot: anti-LC3

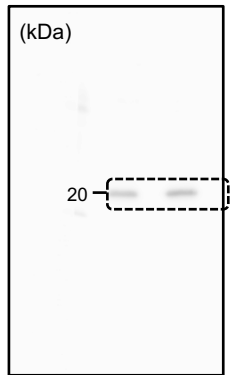

Blot: Tom20

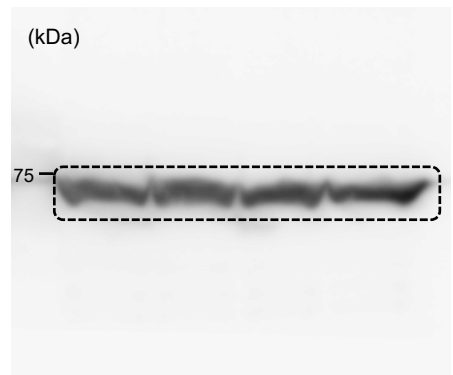

Blot: anti-mitHSP70

**Figure 5F**

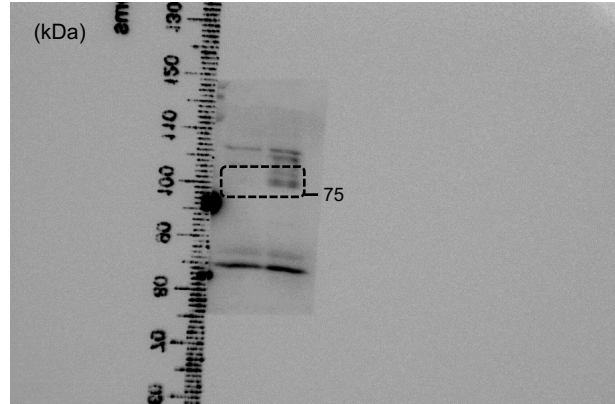

Blot: anti-FTMT

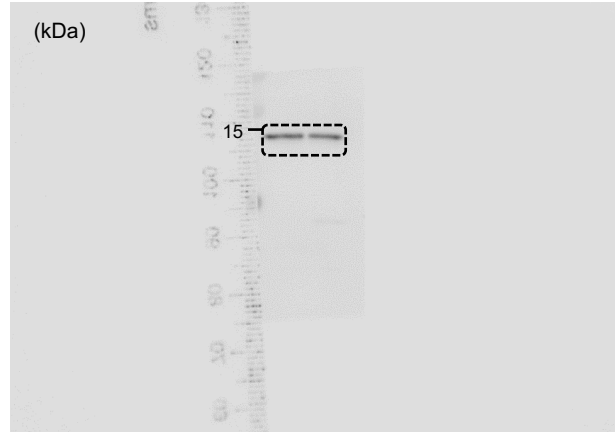

Blot: anti-VDAC

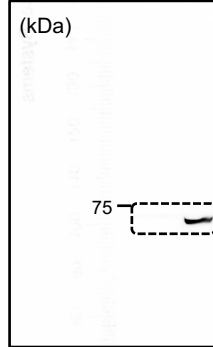

Blot: anti-mitHSP70

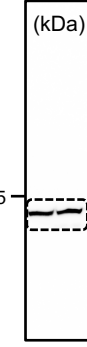

Blot: anti-mitHSP70
